# Supplementary material for: Comprehensive Review: Unveiling the Pro-Oncogenic Roles of IL-1ß and PD-1/PD-L1 in NSCLC Development and Targeting Their Pathways for Clinical Management
Source: MDPI journal article supplement (doi:10.3390/ijms241411547), 2023-07-17
Supplement: s1 [file s1]

**Table S1.** List of PD-1/PD-L1 inhibitors and corresponding clinical trials for NSCLC.

| Name          | Class                              | Target | Phase                                    | n =                | Primary Outcome                   | Control vs. intervention arms                                                                 |
|---------------|------------------------------------|--------|------------------------------------------|--------------------|-----------------------------------|-----------------------------------------------------------------------------------------------|
| Pembrolizumab | IgG4 engineered humanized antibody | PD-1   | NCT01905657 (phase II/III) (KEYNOTE-010) | 1034               | OS, PFS, AEs, ORR                 | Pembrolizumab 2 mg/kg versus Pembrolizumab 10 mg/kg versus Docetaxel                          |
|               |                                    |        | NCT02142738 (phase III) (KEYNOTE-024)    | 305                | PFS                               | Pembrolizumab versus SOC chemotherapy                                                         |
| Nivolumab     | IgG4 fully human antibody          | PD-1   | NCT01673867 (phase III) (CheckMate057)   | 792                | OS, one year OS, number of deaths | Nivolumab versus Docetaxel                                                                    |
|               |                                    |        | NCT01642004 (phase III) (CheckMate 017)  | 352                | OS, number of deaths              | Nivolumab versus Docetaxel                                                                    |
|               |                                    |        | NCT02041533 (phase III) (CheckMate 026)  | 1325               | PFS                               | Nivolumab versus Investigator choice of chemotherapy                                          |
|               |                                    |        | NCT02713867 (phase III) (CheckMate 384)  | 363                | PFSR by 6 months and 12 months    | Nivolumab 480 mg Q4W versus Nivolumab 240 mg Q2W                                              |
| Cemiplimab    | fully humanized IgG4 mAb           | PD-1   | NCT03409614 (phase III) (EMPOWER-Lung 3) | Active recruitment | OS                                | Platinum-based doublet chemotherapy versus Cemiplimab + Platinum-based doublet chemotherapy   |
|               |                                    |        | NCT03515629 (phase III)                  | Terminated         | PFS                               | Pembrolizumab versus Cemiplimab + ipilimumab versus Cemiplimab plus chemotherapy + ipilimumab |
|               |                                    |        | NCT03088540 (phase III) (EMPOWER-Lung 1) | 712                | OS, PFS                           | Standard-of-care chemotherapy versus Cemiplimab                                               |
| Durvalumab    | human IgG1 kappa                   | PD-L1  | NCT02125461 (phase III) (PACIFIC)        | 713                | PFS, OS                           | Durvalumab versus Placebo                                                                     |
|               |                                    |        | NCT02453282 (phase III) (MYSTIC)         | 1118               | OS, PFS                           | Durvalumab Monotherapy versus Durvalumab + Tremelimumab versus SoC chemotherapy               |

|              |                                |       |                                            |      |                                     |                                                                                                                                                                      |
|--------------|--------------------------------|-------|--------------------------------------------|------|-------------------------------------|----------------------------------------------------------------------------------------------------------------------------------------------------------------------|
| Atezolizumab | IgG1<br>monoclonal<br>antibody | PD-L1 | NCT02367794<br>(phase III)<br>(IMpower131) | 1021 | PFS, OS                             | Nab-Paclitaxel +<br>Carboplatin versus<br>Atezolizumab + Nab-<br>Paclitaxel + Carboplatin<br>versus Atezolizumab +<br>Paclitaxel + Carboplatin                       |
|              |                                |       | NCT02409342<br>(phase III)<br>(IMpower110) | 572  | OS                                  | Chemotherapy<br>(Carboplatin/ Cisplatin) +<br>(Pemetrexed/ Gemcitabine)<br>versus Atezolizumab                                                                       |
|              |                                |       | NCT02008227<br>(phase III)<br>(OAK)        | 1225 | % of<br>patients<br>who<br>died, OS | Docetaxel versus<br>Atezolizumab                                                                                                                                     |
|              |                                |       | NCT02367781<br>(phase III)<br>(IMpower130) | 723  | PFS, OS                             | Atezolizumab + Nab-<br>Paclitaxel + Carboplatin<br>versus Nab-Paclitaxel +<br>Carboplatin                                                                            |
|              |                                |       | NCT02366143<br>(phase III)<br>(IMpower150) | 1202 | PFS, OS                             | Bevacizumab + Paclitaxel +<br>Carboplatin versus<br>Atezolizumab +<br>Bevacizumab + Paclitaxel +<br>Carboplatin versus<br>Atezolizumab + Paclitaxel +<br>Carboplatin |

|          |                                                       |       |                                                     |     |    |                           |
|----------|-------------------------------------------------------|-------|-----------------------------------------------------|-----|----|---------------------------|
| Avelumab | completely<br>human<br>IgG1<br>monoclonal<br>antibody | PD-L1 | NCT02395172<br>(phase III)<br>(JAVELIN Lung<br>200) | 792 | OS | Avelumab versus Docetaxel |
|----------|-------------------------------------------------------|-------|-----------------------------------------------------|-----|----|---------------------------|

**Legend:** PD-1—programmed cell death 1; PD-L1—programmed death ligand 1; OS—overall survival; PFS—progression-free survival; AE—adverse events; PFSR—progression-free survival rate

**Table S2.** Immune-Related Adverse Events (irAEs) related to PD-1/PD-L1 inhibitors.

| Drug name     | Mechanisms      | More common irAEs [104–106]                                      | Adverse reaction rate (Grade 3-5) [107] |
|---------------|-----------------|------------------------------------------------------------------|-----------------------------------------|
| Pembrolizumab | PD-1 inhibitors | Rash, pruritus,<br>diarrhea,<br>transaminitis,<br>hypothyroidism | 16.58%                                  |
| Nivolumab     | PD-1 inhibitors | Rash, pruritus,<br>Vitiligo, diarrhea                            | 15.72%                                  |
| Cemiplimab    | PD-1 inhibitors | Diarrhea,<br>transaminitis                                       | 18% [108]                               |

**Legend:** Adverse events caused by immunotherapy were termed immune-related adverse events (irAEs), with an incidence between 15 and 90% [104]. Compared to PD-1 inhibitors, grade 3–4 irAEs were more common with anti-CTLA-4 agents (31% vs.10%) [109]. Pneumonitis, hypothyroidism, arthralgias,

and vitiligo are more common in patients treated with anti-PD-1 inhibitors [107].
